# Supplementary material
Source: publisher figshare collection journal article supplement (https://acs.figshare.com/ndownloader/files/23235536)
Supplement: Supplementary file 1 [file 23235536]

## Supporting Information

# **Selective Synthesis of $\text{Bi}_2\text{Te}_3/\text{WS}_2$ Heterostructures with Strong Interlayer Coupling**

Ethan Kahn†‡, Michael Lucking⊥, Fu Zhang†‡, Yu Lei§‡, Tomotaroh Granzier-Nakajima§‡, Daniel GrasseschiΔ, Kory Beach⊥, William Murray||, Yin-Ting Yeh§, Ana Laura Elias§‡, Zhiwen Liu||, Humberto Terrones⊥, Mauricio Terrones†‡§#\*

†Department of Materials Science and Engineering, ‡Center for 2-Dimensional and Layered Materials, §Department of Physics, ||Department of Electrical Engineering, #Department of Chemistry, The Pennsylvania State University, University Park, PA 16802, United States

⊥Department of Physics, Applied Physics and Astronomy, Rensselaer Polytechnic Institute, Troy, New York 12180, United States

ΔSurface Chemistry & Nanomaterials Laboratory, Department of Inorganic Chemistry, Chemistry Institute, Federal University of Rio de Janeiro (UFRJ), 21941-909, Rio de Janeiro, Brazil

Corresponding Author: Mauricio Terrones

Email: mut11@psu.edu

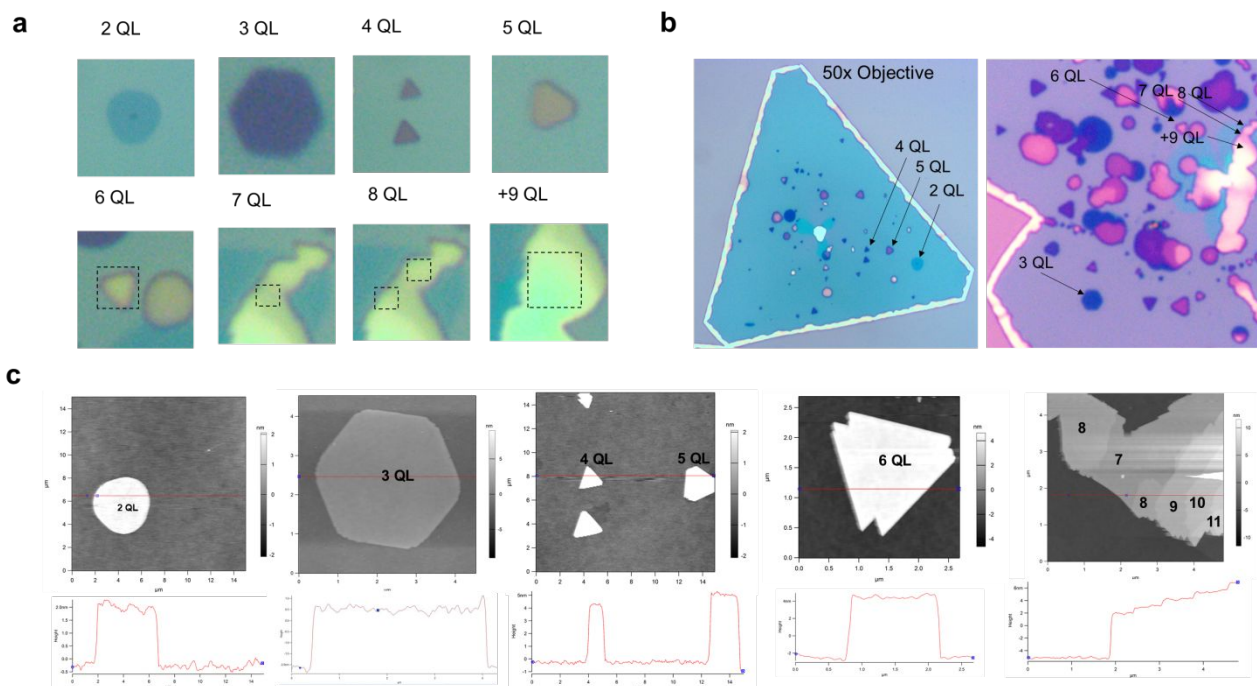

**Figure S1.** Layer-dependence on VdWH color. (a) Optical micrographs of  $\text{Bi}_2\text{Te}_3/\text{WS}_2$  VdWHs with a 150x objective. (b) Optical micrographs of the same areas at 50x magnification. Note that the color observed depends partly on the optics. For instance, 7-9 layers are difficult to distinguish in (a), but display different shades of pink in the 50x image. (c) AFM data

corroborating the layer assignments in (a,b).

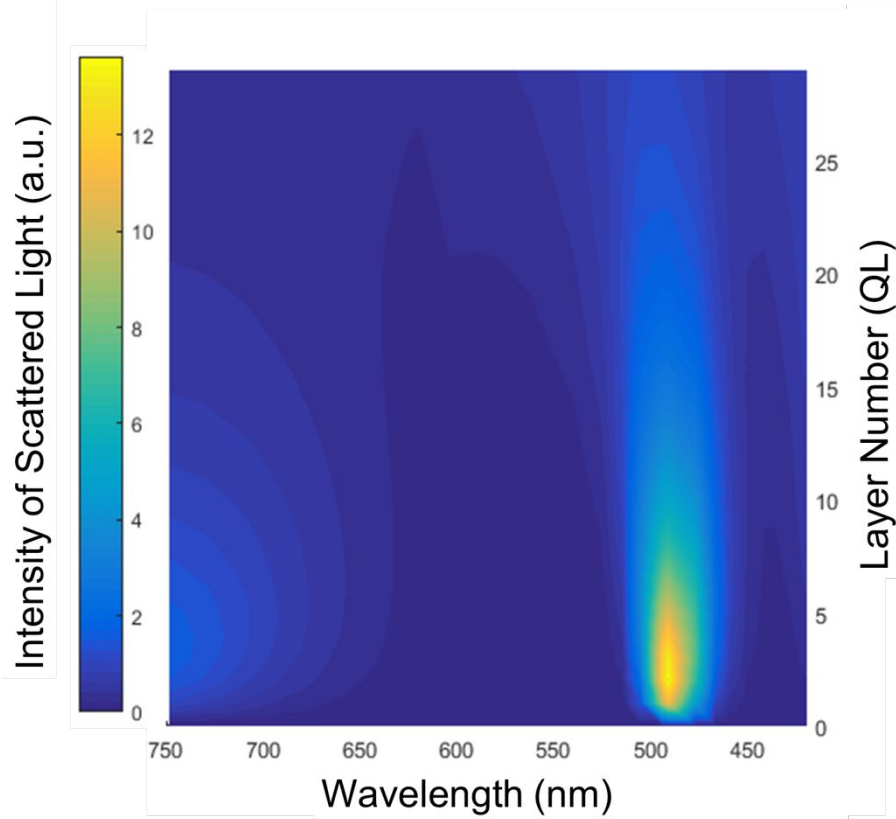

**Figure S2.** Thin film interference calculation. The intensity of backscattering is plotted as a function of layer number and wavelength. Scattering occurs at 4 interfaces: air/Bi<sub>2</sub>Te<sub>3</sub>/WS<sub>2</sub>/SiO<sub>2</sub>/Si. From known layer thicknesses and dielectric functions,<sup>1–3</sup> the intensity of light backscattered 90° from a thin film may be quantified by

$$I = \int_0^t |F_{ex}(\lambda)F_{sc}(\lambda)|^2 dx,$$

where  $I$  is the intensity of backscattered light,  $t$  is the thickness of the Bi<sub>2</sub>Te<sub>3</sub>, and  $F_{ex}$  and  $F_{sc}$  represent the effective absorption and backscattering of light from depth  $x$ .<sup>4,5</sup> Note that the scattering of green and blue light decreases monotonically with increasing QLs, while that of red light peaks at 5 QL. These trends qualitatively account for the colors we observe, with blue-green (2QL) turning to purple for 3-5 layers, and approaching white for >9QL, as the scattering intensity approaches parity across the visible spectrum.

### Creating Defects by Annealing

Annealing at high temperatures is a facile alternative to a plasma treatment for creating defects that does not involve exposure to solvents and polymers, which might alter the 2D material's surface chemistry. Processing parameters including the

temperature, pressure, and the choice of fill gas during annealing will affect the density and identity of the resulting defects. Some mild oxidation likely occurs to the defective crystals, either due to residual oxygen in the reactor, or on exposure to the ambient.

Figures S13,4 illustrate an increase in the nucleation rate of  $\text{MoS}_2$  and  $\text{WS}_2$  following the creation of defects via annealing.

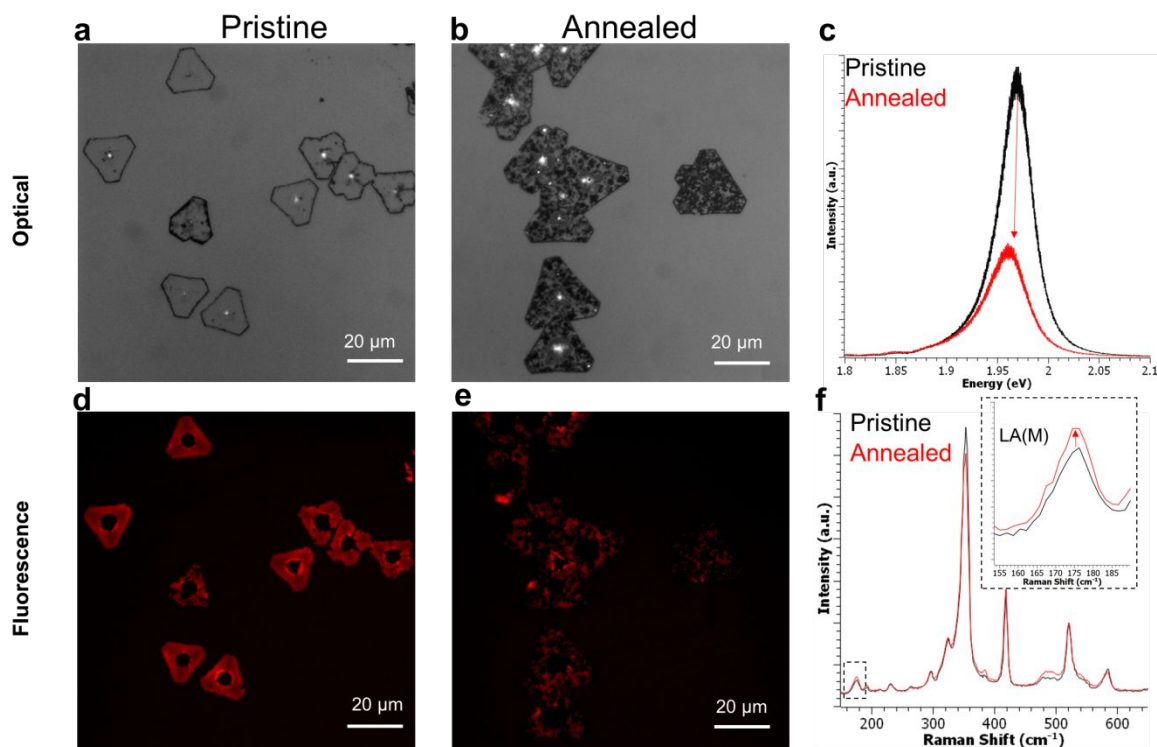

**Figure S3.** Defect Engineering of Nucleation Density on  $\text{WS}_2$ . (a,d) Optical and fluorescence images of  $\text{Bi}_2\text{Te}_3$  grown on pristine  $\text{WS}_2$  monolayers. Nucleation is limited to the edges and ad-layers near the crystal's center. (b,e) Optical and fluorescence images of  $\text{Bi}_2\text{Te}_3$  grown on  $\text{WS}_2$  samples annealed under Ar at 50 mTorr and 700 °C for one hour. This process is known to produce 0D defects, primarily sulfur vacancies.<sup>6</sup> On the defective basal plane, the nucleation density is greatly increased. (c) PL spectrum from a  $\text{WS}_2$  monolayer before and after annealing. The decreased intensity and broadening of the peak indicate a higher defect density. (f) Raman spectra of  $\text{WS}_2$  monolayers with 514nm excitation before and after annealing. An increase in the relative intensity of the LA(M) mode is a signature of defects.<sup>7,8</sup>

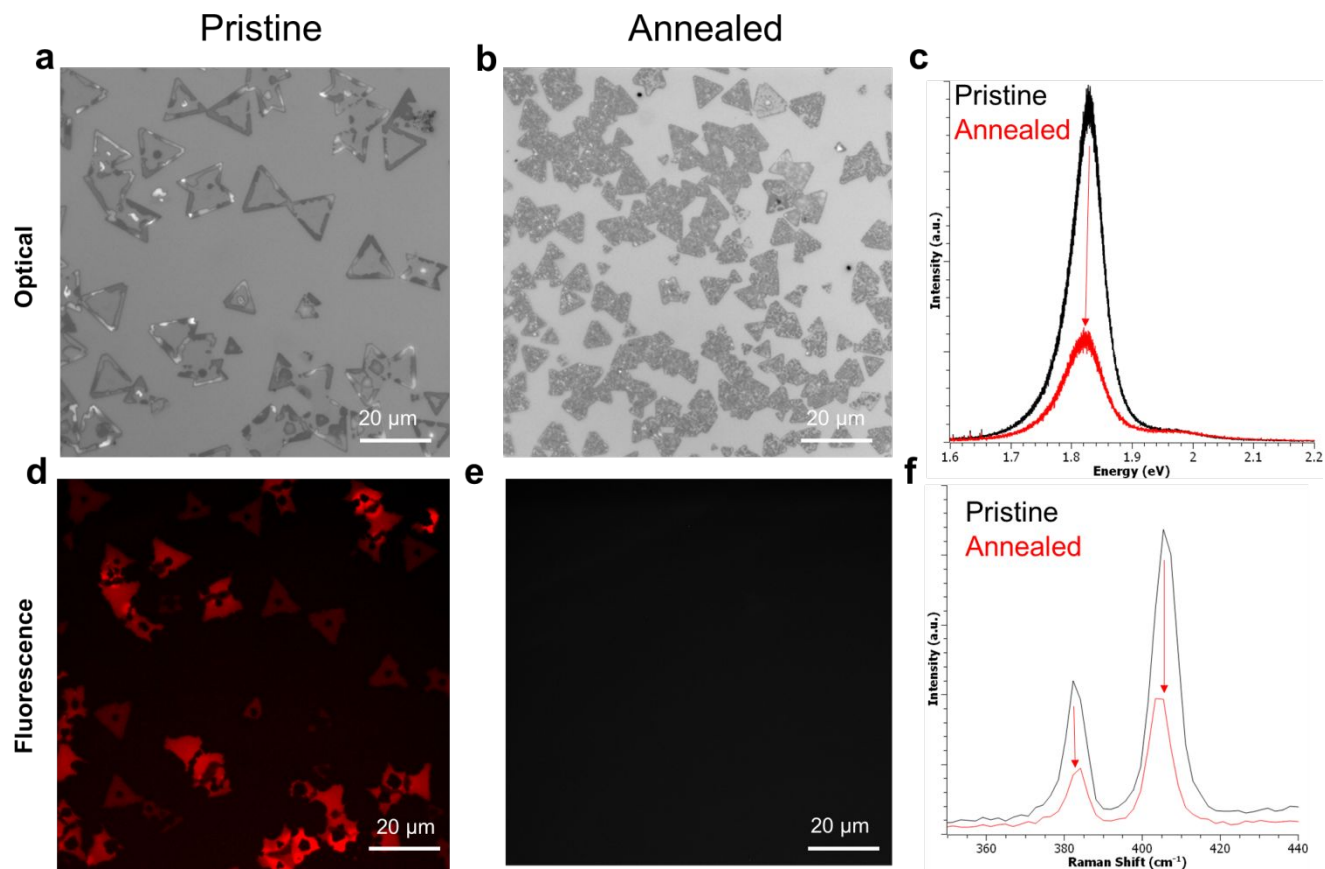

**Figure S4.** Defect Engineering of Nucleation Density on MoS<sub>2</sub>. (a,d) Optical and fluorescence images of Bi<sub>2</sub>Te<sub>3</sub> grown on pristine MoS<sub>2</sub> monolayers. Nucleation is limited to the edges and ad-layers near the crystal's center. (b,e) Optical and fluorescence images of Bi<sub>2</sub>Te<sub>3</sub> grown on MoS<sub>2</sub> samples annealed under Ar at 50 mTorr and 500 °C for one hour. (c,f) PL and Raman spectra, respectively, collected with 488nm excitation. Reduced intensities indicate an increase in the defect density.

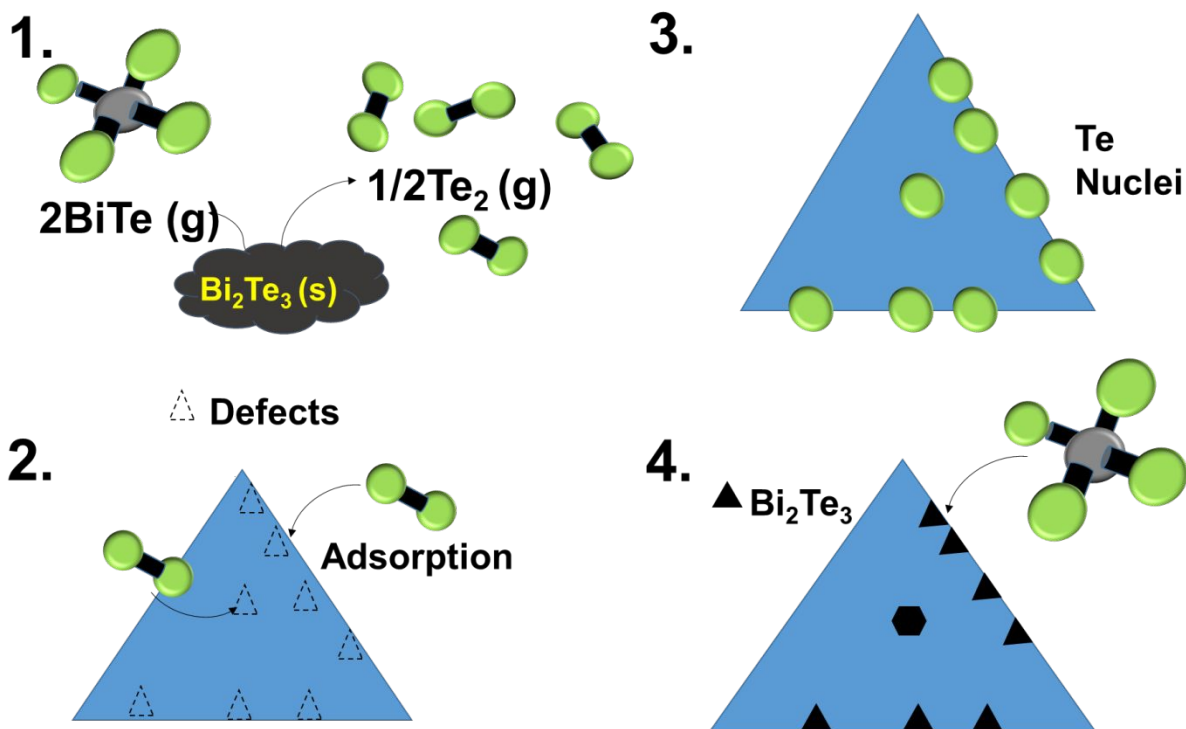

**Figure S5.** Proposed Mechanism for Enhanced Nucleation. (a) Step 1, vaporization of  $\text{Bi}_2\text{Te}_3$ : For the specific case of  $\text{Bi}_2\text{Te}_3$ , sublimation of the bulk powders is known to proceed incongruently, resulting in a higher partial pressure of  $\text{Te}_2$  than  $\text{BiTe}$  and other Bi-rich phases.<sup>9</sup> Step 2, adsorption of  $\text{Te}_2$  on  $\text{WS}_2$ : As a consequence of this,  $\text{Te}_2$  is likely the first compound to deposit on the growth substrate. Step 3, formation of a Te nucleus: it has been observed that PVD growth of  $\text{Bi}_2\text{Te}_3$  on Si begins with the formation of a Te nucleus, which is stable as a separate phase at typical substrate temperatures.<sup>10</sup> Given the affinity of transition metals for chalcogens, it is plausible that S vacancies and the resulting W dangling bonds play a key role in the adsorption of  $\text{Te}_2$ , to initiate seed formation. Step 4:  $\text{Bi}_2\text{Te}_3$  crystal growth. As bismuth-rich species deposit on the substrate, they will grow from Te seeds. A relatively low growth temperature is likely important to the patterned growth seen in the main text. By limiting desorption into the gas phase and surface diffusion away from defective sites, growth can be limited to the patterned regions.

#### Growth of $\text{Te/WS}_2$ Heterostructures

To test the plausibility of the Te-seeded mechanism outlined in Figure S5,  $\text{Te/WS}_2$  vertical heterostructures were synthesized by evaporating Te powders under the same conditions as  $\text{Bi}_2\text{Te}_3$ . Optical micrographs of these heterostructures (Figure S6) indicate nucleation and growth of Te on edges and grain boundaries, similar to the



growth of  $\text{Bi}_2\text{Te}_3$ . This supports the hypothesis that initial deposition of Te in these defect-rich regions seeds the subsequent growth of  $\text{Bi}_2\text{Te}_3$ .

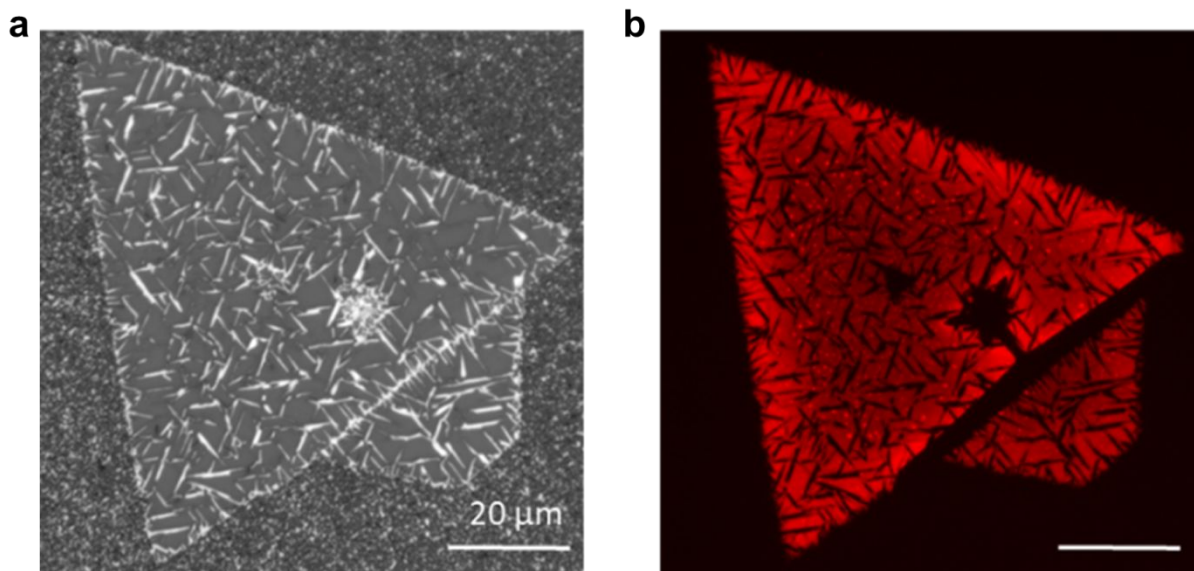

**Figure S6.** Tellurium nucleation on  $\text{WS}_2$ . (a) Optical micrograph and (b) fluorescence micrograph of a  $\text{Te}/\text{WS}_2$  heterostructure. The preferential nucleation and growth of Te on defect-rich edges and grain boundaries indicates the plausibility of a Te-seeded growth mechanism.

#### Observation of Rod-like Heterostructures

When growth substrates were placed closer to the edge of the furnace, rod-like growth morphologies were also observed. As seen in the optical micrographs of Figure S7, the nucleation of these heterostructures could also be patterned. Because Te grows in rod-like morphologies, further characterization was done to ascertain the identity of these crystals, and gain further insight of the growth mechanism. The TEM displayed in Figure S8 reveals that these rods are made of nanocrystals growing along the zigzag directions of  $\text{WS}_2$ . Furthermore, the SAED pattern reveals the crystal structure of  $\text{Bi}_2\text{Te}_3$ . While an explanation of this phenomenon is beyond the scope of this work,

these observations suggest that 1D defects or heterogeneities (line defects, wrinkles, etc.) may also play a role in mediating the growth of 2D heterostructures.

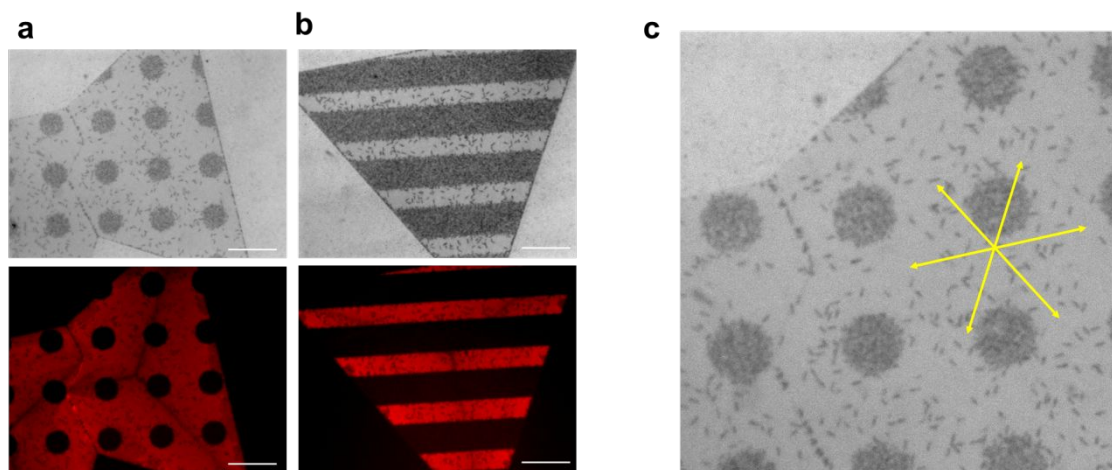

**Figure S7.** Patterning of rod-like  $\text{Bi}_2\text{Te}_3$  heterostructures (a,b) Optical and fluorescence images of circle and bar patterns. Scale bars are 20  $\mu\text{m}$ . These structures form when substrates are placed further downstream in the reactor. (c) Higher magnification image of a pattern. Yellow arrows in (c) indicate zigzag directions, with which rods seem to align.

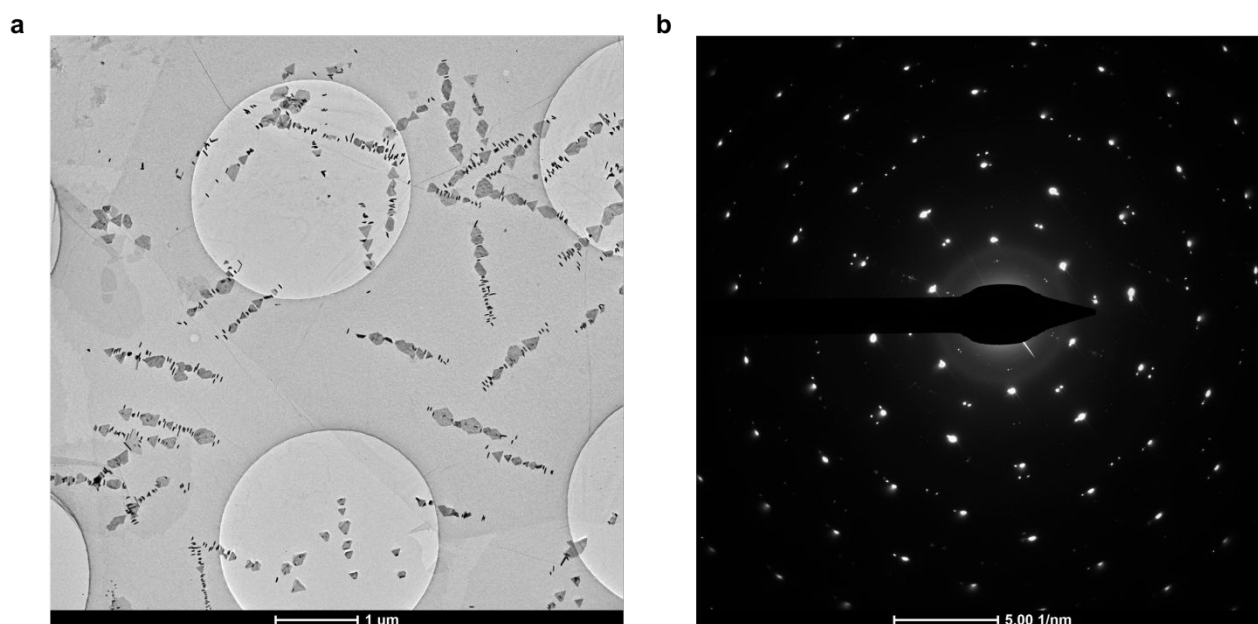

**Figure S8.** Microscopy of Rod-like Growth. (a) TEM of “rods” indicate that they are actually small 2D layers growing in a line. (b) The SAED pattern reveals that these structures are also  $\text{Bi}_2\text{Te}_3$ . The direction of these rods aligns with zigzag directions, as

indicated in **S5c**. This suggests that 1D defects may also guide the nucleation and growth of  $\text{Bi}_2\text{Te}_3$  on  $\text{WS}_2$ .

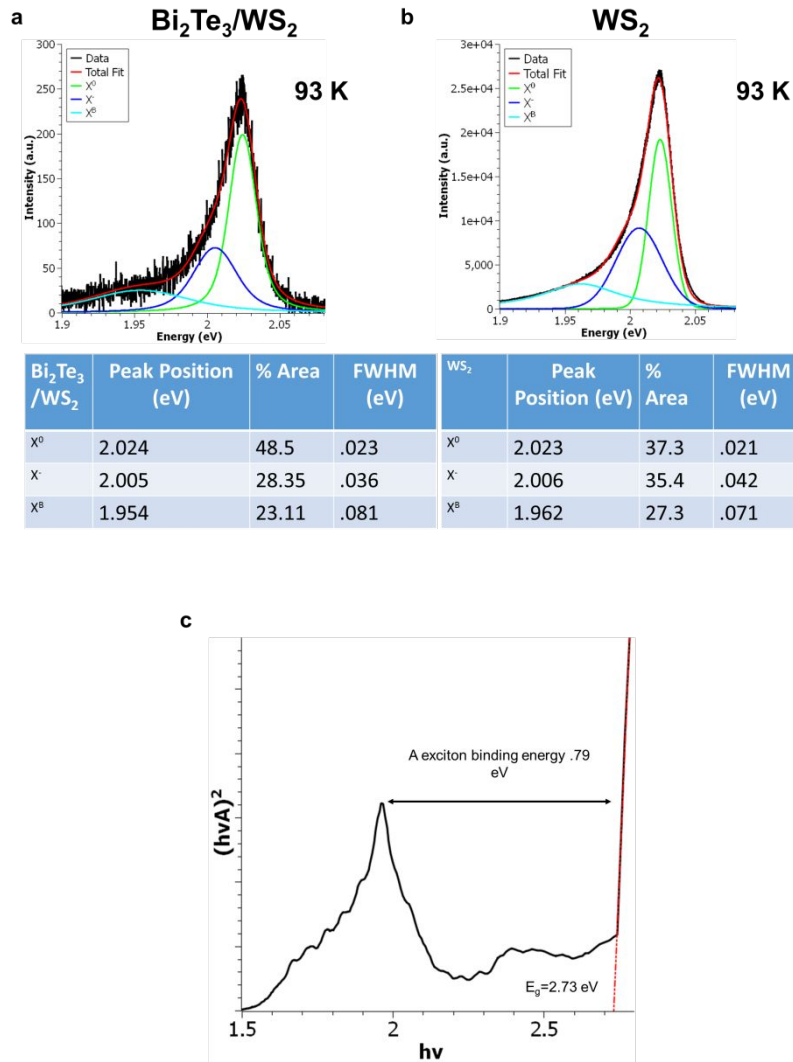

**Figure S9.** Low Temperature PL and Tauc plot of  $\text{WS}_2$  monolayer. (a,b) PL curves from  $\text{WS}_2$  and  $\text{Bi}_2\text{Te}_3/\text{WS}_2$  at  $-180^\circ\text{C}$ . Neutral exciton ( $X^0$ ), trion ( $X^-$ ), and a bound exciton peaks ( $X^B$ ) are fit. Peak fittings are summarized in the tables below each plot. (c) Tauc plots are a useful way of estimating the band gap of a semiconductor and determining if it is a direct or indirect band gap material, from absorption data.<sup>11</sup> To validate our interpretation of VdWH data, we first measure monolayer  $\text{WS}_2$ , estimating a quasiparticle band gap of 2.73 eV and an A exciton binding energy of .79 eV. These values are comparable to previous reports.<sup>12</sup>



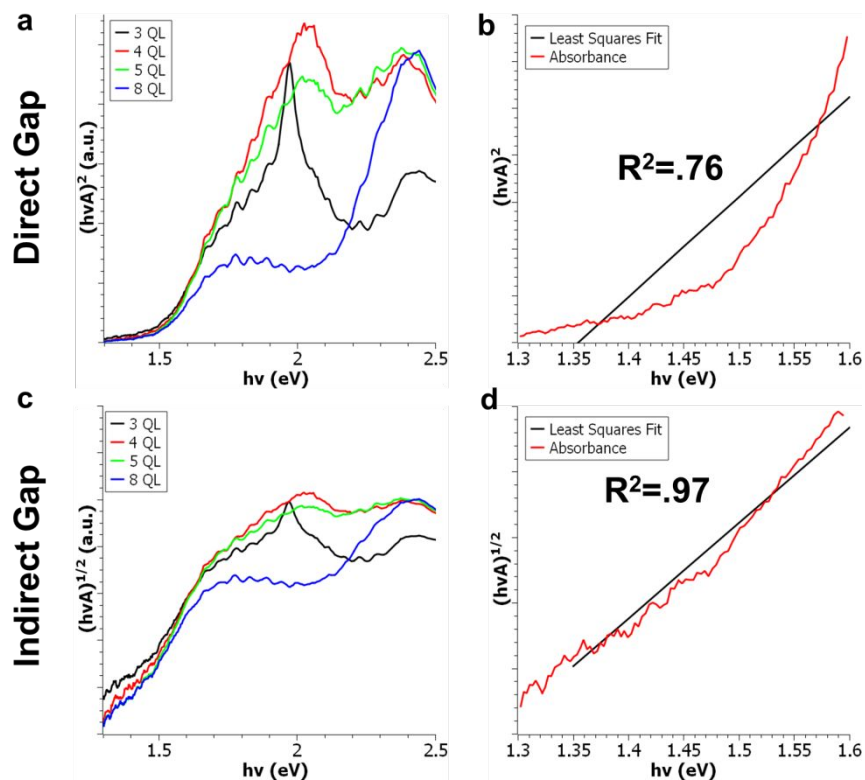

**Figure S10.** Tauc plots of Bi<sub>2</sub>Te<sub>3</sub>/WS<sub>2</sub>. (a,b) Tauc plots and a representative fitting of the absorption edge, assuming a direct band gap. (c,d) Tauc plots and a representative fitting of the absorption edge, assuming an indirect band gap. These data indicate that the vdWH has an indirect band gap, in agreement with DFT results.

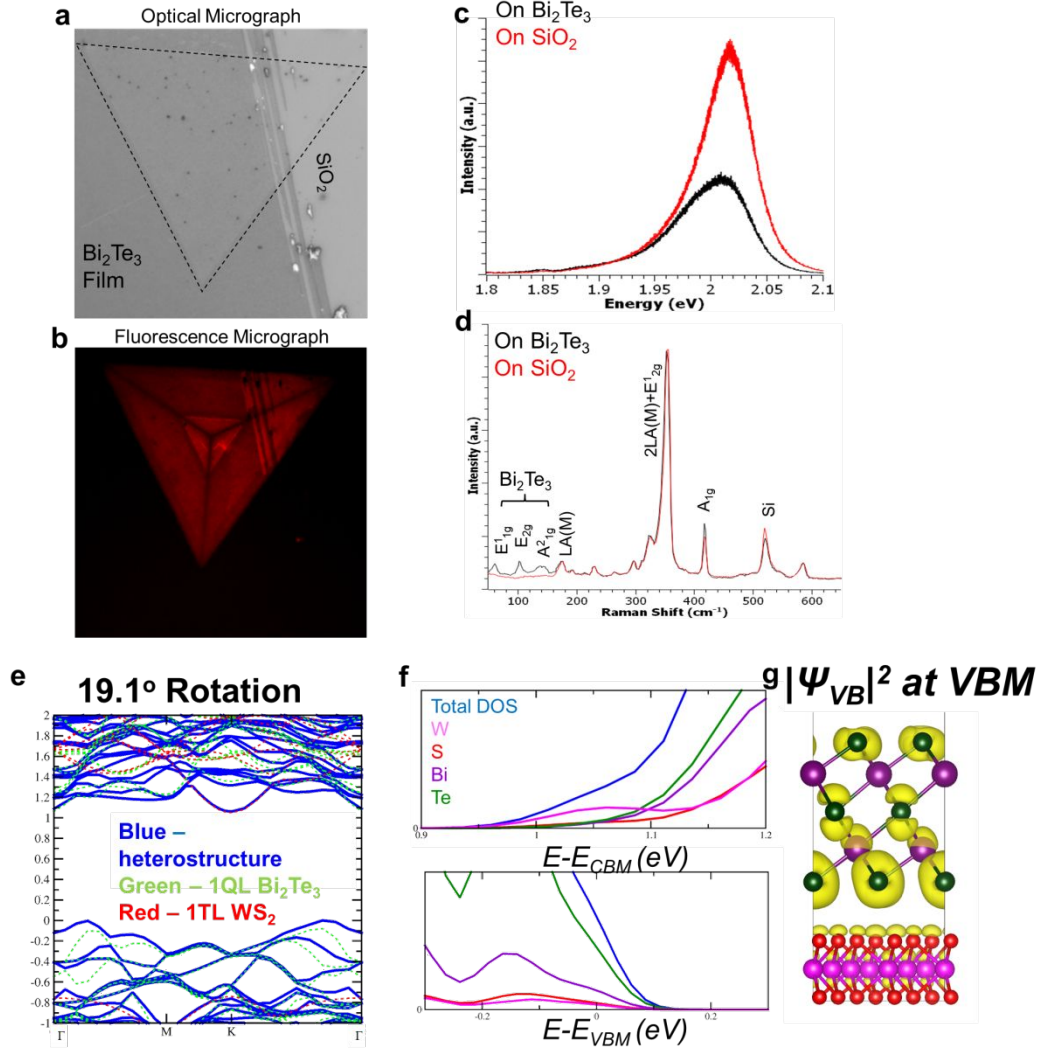

**Figure S11.** Optical characterization of transferred VdWHs and rotational calculations. (a,b) Optical and fluorescence micrographs of  $\text{WS}_2/\text{Bi}_2\text{Te}_3$  VdWHs formed by the mechanical transfer of  $\text{WS}_2$  monolayers onto a scratched, polycrystalline  $\text{Bi}_2\text{Te}_3$  film with a thickness of 3-4 QL. (c,d) PL and Raman spectra of transferred heterostructures. When compared to of the main text, no signs of strong interlayer coupling are observed (i.e. 99% quenching of PL, decrease in 2LA(M) mode). (e) DFT band structure of 1QL/1TL VdWH with a 19.1° twist. The band structure is qualitatively similar to the epitaxial case. (f) PDOS plot and (g) electron density cloud of the VBM. These figures also indicate orbital contributions to the VBM across the gap for the non-epitaxial case. Consequently, we attribute the poor coupling seen in this figure to the interlayer spacing rather than an arbitrary rotation angle.

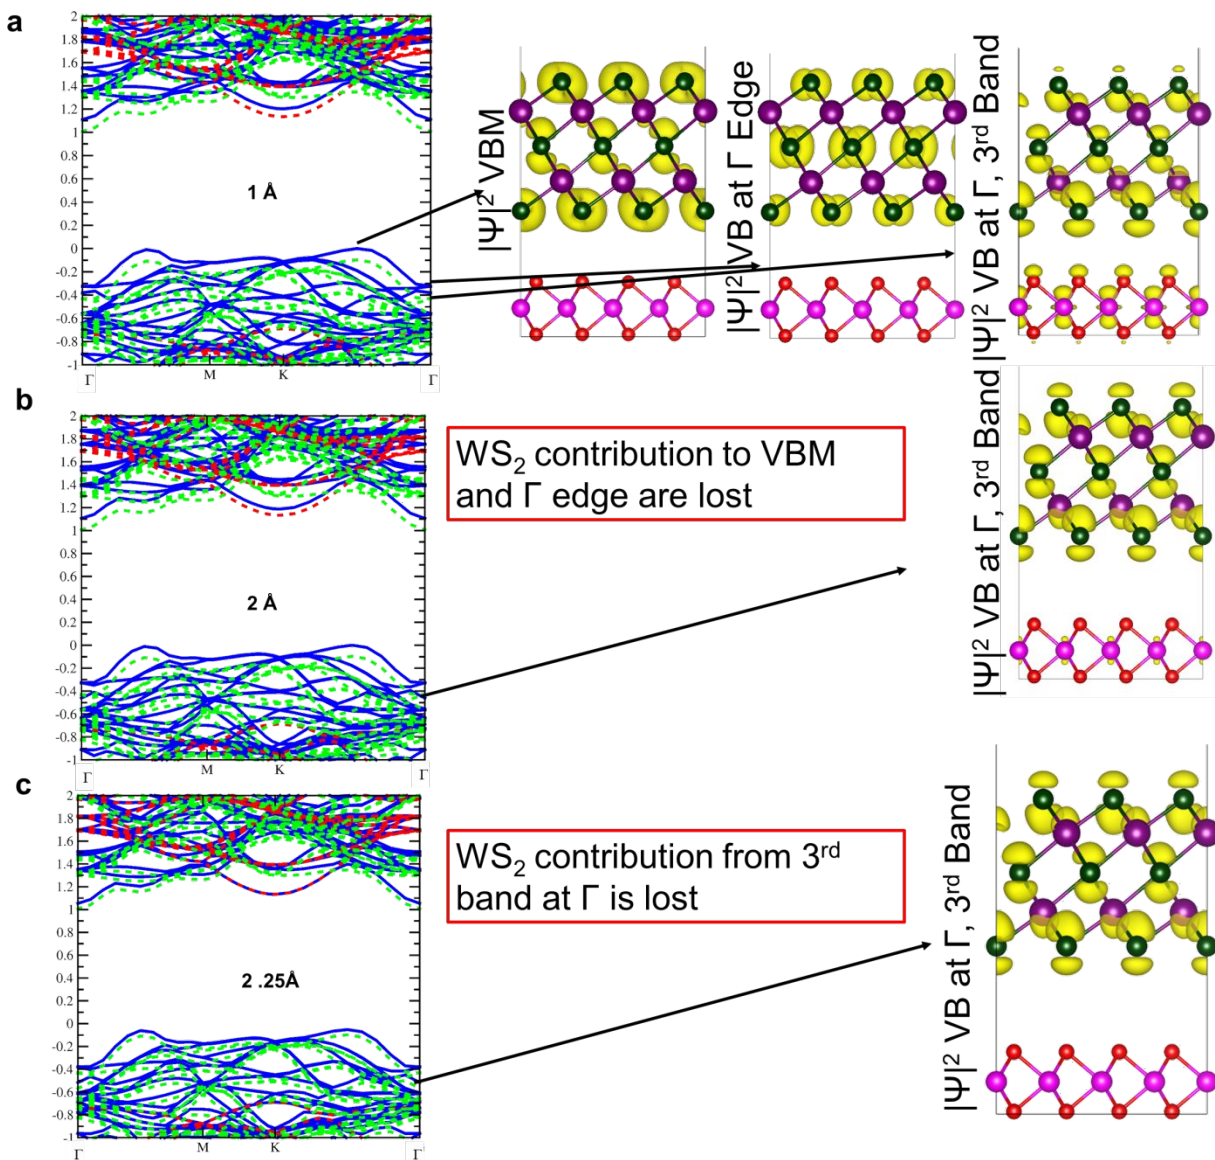

**Figure S12.** DFT-predicted effects of interlayer spacing. The band structures for spacings of (a) 1 Å, (b) 2 Å, and (c) 2.25 Å are shown with corresponding  $|\psi|^2$ 's for three positions in the band structure, at the VBM, the valence band edge at the gamma point, and the third highest band at the gamma point, where the WS<sub>2</sub> contribution persists longer. These regions are indicated by arrows on the band structures.

## References

- (1) Li, Y.; Chernikov, A.; Zhang, X.; Rigosi, A.; Hill, H. M.; Van Der Zande, A. M.; Chenet, D. A.; Shih, E. M.; Hone, J.; Heinz, T. F. Measurement of the Optical

- Dielectric Function of Monolayer Transition-Metal Dichalcogenides: MoS<sub>2</sub>, MoSe<sub>2</sub>, WS<sub>2</sub>, and WSe<sub>2</sub>. *Phys. Rev. B - Condens. Matter Mater. Phys.* **2014**, *90*, 1–6.
- (2) Aspnes, D. E.; Studna, A. A. Dielectric Functions and Optical Parameters of Si, Ge, GaP, GaAs, GaSb, InP, InAs, and InSb from 1.5 to 6.0 EV. *Phys. Rev. B* **1983**, *27*, 985–1009.
  - (3) Cui, H.; Bhat, I.; Venkatasubramanian, R. Optical Constants of Bi<sub>2</sub>Te<sub>3</sub> and Sb<sub>2</sub>Te<sub>3</sub> Measured Using Spectroscopic Ellipsometry. *J. Electron. Mater.* **1999**, *28*, 1111–1114.
  - (4) Li, S. L.; Miyazaki, H.; Song, H.; Kuramochi, H.; Nakaharai, S.; Tsukagoshi, K. Quantitative Raman Spectrum and Reliable Thickness Identification for Atomic Layers on Insulating Substrates. *ACS Nano* **2012**, *6*, 7381–7388.
  - (5) Buscema, M.; Steele, G. A.; van der Zant, H. S. J.; Castellanos-Gomez, A. The Effect of the Substrate on the Raman and Photoluminescence Emission of Single-Layer MoS<sub>2</sub>. *Nano Res.* **2014**, *7*, 1–11.
  - (6) Tongay, S.; Suh, J.; Ataca, C.; Fan, W.; Luce, A.; Kang, J. S.; Liu, J.; Ko, C.; Raghunathanan, R.; Zhou, J.; *et al.* Defects Activated Photoluminescence in Two-Dimensional Semiconductors: Interplay between Bound, Charged and Free Excitons. *Sci. Rep.* **2013**, *3*, 2657.
  - (7) Chow, P. K.; Jacobs-Gedrim, R. B.; Gao, J.; Lu, T. M.; Yu, B.; Terrones, H.; Koratkar, N. Defect-Induced Photoluminescence in Monolayer Semiconducting Transition Metal Dichalcogenides. *ACS Nano* **2015**, *9*, 1520–1527.

- (8) McCreary, A.; Berkdemir, A.; Wang, J.; Nguyen, M. A.; Elías, A. L.; Perea-López, N.; Fujisawa, K.; Kabius, B.; Carozo, V.; Cullen, D. A.; *et al.* Distinct Photoluminescence and Raman Spectroscopy Signatures for Identifying Highly Crystalline WS<sub>2</sub> Monolayers Produced by Different Growth Methods. *J. Mater. Res.* **2016**, *31*, 931–944.
- (9) Brebrick, R. F.; Smith, F. T. J. Partial and Total Vapor Pressures over Molten Bi<sub>2</sub>Te<sub>3</sub>. *J. Electrochem. Soc.* **1971**, *118*, 991.
- (10) Zhao, Y.; de la Mata, M.; Qiu, R. L. J.; Zhang, J.; Wen, X.; Magen, C.; Gao, X. P. A.; Arbiol, J.; Xiong, Q. Te-Seeded Growth of Few-Quintuple Layer Bi<sub>2</sub>Te<sub>3</sub> Nanoplates. *Nano Res.* **2014**, *7*, 1243–1253.
- (11) Tauc, J.; Grigorovici, R.; Vancu, A. Optical Properties and Electronic Structure of Amorphous Germanium. *phys. stat. sol.* **1966**, *15*, 627–637.
- (12) Ye, Z.; Cao, T.; O'Brien, K.; Zhu, H.; Yin, X.; Wang, Y.; Louie, S. G.; Zhang, X. Probing Excitonic Dark States in Single-Layer Tungsten Disulfide. *Nature* **2014**, *513*, 214–218.
